# Supplementary material for: Facile and controllable fabrication of three-dimensionally quasi-ordered macroporous TiO2 for high performance lithium-ion battery applications
Source: Royal Society of Chemistry journal article supplement (doi:10.1039/c3nj00024a), 2013-01-01
Supplement: c3nj00024a.pdf [file c3nj00024a.pdf]

## Supporting Information

# **Facile and controllable fabrication of three-dimensionally quasi-order macroporous TiO<sub>2</sub> for high performance lithium-ion batteries applications**

Hongliang Jiang,<sup>a</sup> Xiaoling Yang,<sup>\*a</sup> Cheng Chen,<sup>b</sup> Yihua Zhu,<sup>\*a</sup> Chunzhong Li<sup>a</sup>

<sup>a</sup>. *Key Laboratory for Ultrafine Materials of Ministry of Education, School of Materials Science and Engineering, East China University of Science and Technology, Shanghai 200237, China.*

<sup>b</sup>. *School of Urban Development and Environmental Engineering, Shanghai Second Polytechnic University, Shanghai 201209, China.*

\*Corresponding author: Fax: +86-21-64250624; E-mail: xlyang@ecust.edu.cn (X. Yang);

yhzhzhu@ecust.edu.cn (Y. Zhu)

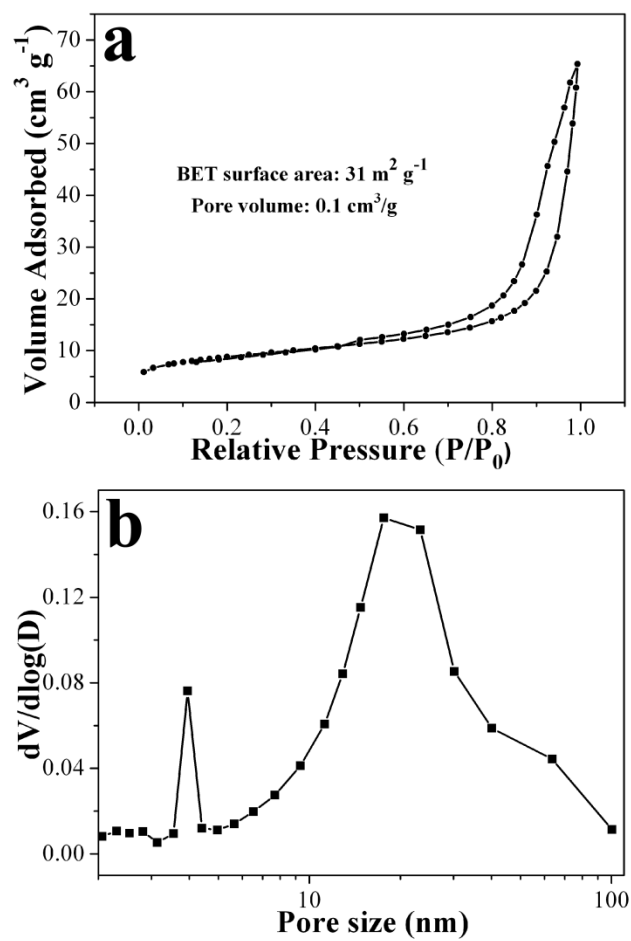

**Figure S1.** N<sub>2</sub> adsorption–desorption isotherms (a) and the corresponding pore size distribution (b) of TiO<sub>2</sub> quasi-inverse opal with dense wall.

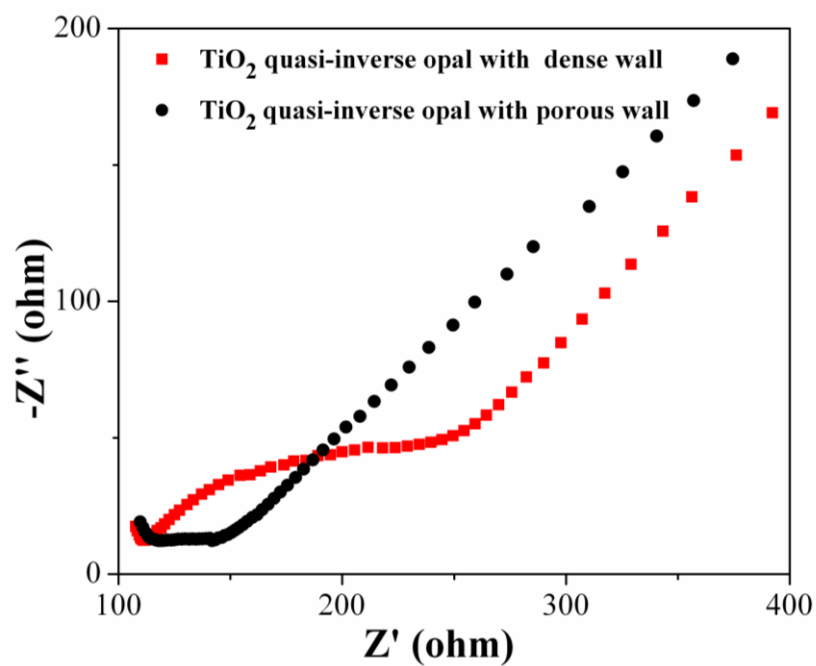

**Figure S2.** Impedance measurement of coin cells using the electrode materials of  $\text{TiO}_2$  quasi-inverse opals.
